# Supplementary material
Source: PubMed Central journal article supplement (PMC2921712)
Supplement: NIHMS219805-supplement-07.pdf [file NIHMS219805-supplement-07.pdf]

## **Supplemental Information**

**Figure S1**, CENP-E T424 (*Xenopus*) is phosphorylated by Aurora A and B *in vitro*, Related to Figure 1

**Figure S2**, pT422 kinetochore staining is specific for CENP-E, Related to Figure 1

**Figure S3**, Imaging CENP-E single molecules, Related to Figure 2

**Figure S4**, CENP-E phosphorylation at T422 is required for chromosome alignment, Related to Figure 3.

**Figure S5**, CENP-E phosphorylation at T422 is required for chromosome alignment, Related to Figure 3.

**Figure S6**, Phosphorylation of T422 is not required for CENP-E's kinetochore localization, and an alternative mutation that prevents phosphorylation at CENP-E T422, Related to Figure 3.

**Figure S7**, Phosphorylation of CENP-E T422 is required for the congression of polar chromosomes, Related to Figure 4

**Movie S1**. Related to Figure 2

**Movie S2**. Related to Figure 3

**Movie S3**, Related to Figure 3

**Movie S4**, Related to Figure 4

**Movie S5**, Related to Figure 6

**Movie S6**, Related to Figure 6

## Supplemental Information

### Supplemental Figure Legends

**Supplemental Figure 1.** CENP-E T424 (*Xenopus*) is phosphorylated by Aurora A and B *in vitro*, Related to Figure 1 (A) Diagram of the *Xenopus* CENP-E motor fragments used as substrates in the *in vitro* kinase assay shown in (B). (B) Aurora A or Aurora B/INCENP kinase assays using various CENP-E motor fragments as substrates. Coomassie staining shows the purified protein and autoradiogram shows the incorporation of  $^{32}\text{P}$ - $\gamma\text{ATP}$ . (C) Phosphopeptide used to generate a rabbit polyclonal pT422 antibody. (D) Aurora A kinase assays performed using recombinant WT or T424A *Xenopus* CENP-E<sup>1-473</sup> as substrates. Samples taken at 0, 10 and 20 min time points were immunoblotted with the pT422 antibody.

**Supplemental Figure 2.** pT422 kinetochore staining is specific for CENP-E, Related to Figure 1 (A) HeLa cells were arrested with nocodazole for 3 hours and fixed and stained for CENP-E (Green), pT422 (Red), Bub1, and DNA (Blue). (B) Immunofluorescence of nocodazole-arrested DLD-1 cells transfected with CENP-E siRNA. Cells were fixed and stained for CENP-E (Green), Bub1, pT422 (Red) and DNA (Blue). The cell on the left was not transfected with the CENP-E siRNA and serves as an internal control.

**Supplemental Figure 3.** Imaging CENP-E single molecules, Related to Figure 2 (A) The experimental setup for imaging CENP-E single motors using TIRF microscopy. *Xenopus* CENP-E<sup>1-473</sup> was tagged with TagRFP-T, and Oregon Green 488-labeled GMPCPP microtubules were immobilized on a coverslip using a tubulin antibody. A low concentration of CENP-E<sup>1-473</sup>-RFP was flowed into the chamber. (B) Kymograph showing microtubule-bound CENP-E<sup>1-473</sup>-RFP in

the presence of apyrase. CENP-E<sup>1-473</sup>-RFPs were photobleached in one or two steps 89% of the time (75 double steps and 68 single, out of 160 total).

**Supplemental Figure 4.** CENP-E phosphorylation at T422 is required for chromosome alignment, Related to Figure 3. (A) Immunoblot showing tetracycline inducible expression of various MycGFP-CENP-E transgenes. (B) Cells were transfected with control (GAPDH) or CENP-E siRNA and WT or T422A MycGFP-CENP-E was expressed for 24 hours. Cells were arrested with MG132 for 1.5 hours, fixed and processed for immunofluorescence. Representative immunofluorescence staining of cells. Green, GFP; Red, Tubulin. (C) Graph quantifying the proportion of cells with polar chromosomes. \*\*\*,  $P < 0.0001$  by  $t$  test. (D) Graph showing the number of polar chromosomes in cells that displayed chromosome misalignment. Bars represent the mean of at least four independent experiments. Error bars represent the SEM.

**Supplemental Figure 5.** CENP-E phosphorylation at T422 is required for chromosome alignment, Related to Figure 3. (A, B) Endogenous CENP-E was replaced with either WT or T422A MycGFP-CENP-E and cells imaged by time-lapse microscopy every 3 minutes from nuclear envelope breakdown. Green, MycGFP-CENP-E; Red, histone H2B-mRFP. Stills are taken from Movie S2 and S3. Time is marked in the upper right of each panel and numbered arrowheads track the movement of individual kinetochore pairs. Arrow head 1 shows a mono-oriented kinetochore pair that moves to the pole of the spindle, while 2 and 3 show kinetochore pairs that successfully congress from the pole. Note, that a number of chromosomes remain stuck at the pole throughout the duration of imaging in cells expressing T422A MycGFP-CENP-E.

**Supplemental Figure 6.** Phosphorylation of T422 is not required for CENP-E's kinetochore localization, and an alternative mutation that prevents phosphorylation at CENP-E T422, Related to Figure 3. (A) Cells were transfected with control (GAPDH) or CENP-E siRNA and WT or T422A MycGFP-CENP-E expressed. Representative immunofluorescence images showing similar levels of WT or T422A MycGFP-CENP-E at the kinetochore. Green, GFP; Red, ACA; Blue, DAPI. (B) Quantitation of the fluorescence intensity of MycGFP-CENP-E at kinetochores. Bars represent the mean of at least 22 cells imaged in two independent experiments. Error bars represent the SEM. (C) Sequence alignment of human and *Xenopus* CENP-E showing the position of the T422A or T424A and RR:KK mutations. (D) *In vitro* kinase assays using Aurora B/INCENP to phosphorylate recombinant WT, T424A or RR:KK *Xenopus* CENP-E<sup>1-428</sup> motor domain fragments for 0, 5, 10, 15, 20, 25, 30 and 60 minutes. Coomassie stained gel shows the purified protein and autoradiogram shows the incorporation of  $\gamma$ -<sup>32</sup>P ATP. (E) WT, T422A or RR:KK MycGFP-CENP-E was immunoprecipitated from nocodazole-arrested DLD-1 cells with Myc antibody and immunoblotted with the pT422 antibody. (F) Box and whisker plots showing the time spent in mitosis for cells expressing MycLAP-CENP-E following transfection of control (GAPDH, green) or CENP-E (red) siRNA. 150 cells per condition are plotted from at least two independent experiments.

**Supplemental Figure 7.** Phosphorylation of CENP-E T422 is required for the congression of polar chromosomes, Related to Figure 4 (A) Endogenous CENP-E was replaced with either WT or T422A MycGFP-CENP-E and cells exposed to a drug treatment scheme to enrich mono- or syntelically oriented chromosomes near spindle poles. (B) and (C) Cells were released from the Aurora kinase inhibitor ZM and imaged every 3 minutes for 1.5 hours. Green, MycGFP-CENP-

E; Red, histone H2B-mRFP. Stills are taken from Movie S4. Time is marked in the upper right of each panel and numbered arrowheads track the movement of individual kinetochore pairs. Arrow head 1 shows a mal-oriented kinetochore pair that moves to the spindle pole and then congresses. Arrow heads 2, 3 and 4 mark kinetochore pairs that move from the pole towards the equator, but fail to congress. These movements may represent CENP-E-mediated lateral sliding along astral microtubules that subsequently undergo catastrophe.

### **Supplemental Movie Legends**

**Movie S1.** (Left) Processive movements of CENP-E<sup>1-473</sup>-TagRFP-T (green) along single, Oregon488-labeled GMPCPP-stabilized microtubules (red). (Right) Processive movements of CENP-E<sup>1-473</sup>-TagRFP-T (green) phosphorylated by Aurora A, along GMPCPP-stabilized microtubules (red). 0.5 sec per frame displayed at 30 frames per second. Movie corresponds to kymographs shown in Figure 2E.

**Movie S2.** Histone H2B-mRFP (red) expressing cell in which endogenous CENP-E has been replaced with WT MycGFP-CENP-E (green). 3 min per frame displayed at two frames per second. Movie corresponds to Figure S5A.

**Movie S3.** Histone H2B-mRFP (red) expressing cell in which endogenous CENP-E has been replaced with T422A MycGFP-CENP-E (green). 3 min per frame displayed at two frames per second. Movie corresponds to Figure S5B.

**Movie S4.** (Left) Histone H2B-mRFP (red) expressing cell in which endogenous CENP-E has been replaced with WT MycGFP-CENP-E (green) Movie corresponds to Figure S7B. (Right) Histone H2B-mRFP (red) expressing cell in which endogenous CENP-E has been replaced with T422A MycGFP-CENP-E (green). Cell was treated with monastrol for 2 hours, released into ZM and MG132 for 1 hour and finally released into MG132 before imaging began. 3 min per frame displayed at two frames per second. Movie corresponds to Figure S7C.

**Movie S5.** Histone H2B-EYFP (pink) expressing HeLa cell microinjected with rhodamine-labeled rabbit IgG antibody (green). 5 min per frame displayed at two frames per second. Movie corresponds to Figure 6C.

**Movie S6.** Histone H2B-EYFP (pink) expressing HeLa cell microinjected with rhodamine-labeled pT422 antibody (green). 5 min per frame displayed at two frames per second. Movie corresponds to Figure 6C.

## **Extended Experimental procedures**

### **Phosphopeptide antibody production and affinity purification**

A synthetic phospho-peptide (KRKRRVpTWCLGK) based on the human CENP-E sequence flanking threonine 422 was generated using standard methods (Biomatik). The phospho-peptide was coupled to KLH (Keyhole limpet hemacyanin, Sigma) using EDC (1-ethyl-3-[3 dimethylaminopropyl] carbodiimide hydrochloride, Pierce) and injected into rabbits (Covance). Polyclonal pT422 antibodies were affinity-purified using the phosphopeptide coupled to a

HiTrap NHS-activated HP column (GE Healthcare). For immunofluorescence and microneedle injection studies, the pT422 was conjugated to Rhodamine Red-X using standard methods.

### **Antibodies for Immunofluorescence**

Staining was performed with the following antibodies: HpX (rabbit anti CENP-E, 1:200) (Yao et al., 1997), 1H12 (mouse monoclonal anti-CENP-E, Abcam, 1:500), ACA (human anti-centromeres, Antibodies Inc, 1:500;), DM1A (mouse anti- $\alpha$ -tubulin, 1:1000), SB1.1 (sheep anti-Bub1, 1:1000) (Taylor et al., 2001), SBR1.1 (Sheep anti-BubR1, 1:1000) (Taylor et al., 2001), Cy5-conjugated hKNL (1  $\mu$ g/ml) (Cheeseman et al., 2008) and Rhodamine Red-X-conjugated anti-pT422 (2.5  $\mu$ g/ml).

### **Immunoblots and immunoprecipitations**

For immunoblot analysis, protein samples were separated by SDS-PAGE, transferred onto nitrocellulose membranes (BioRad) and then probed with the following antibodies: 4A6 (mouse anti-Myc, Upstate, 1:1000), HpX (rabbit anti CENP-E, 1:200) (Yao et al., 1997), DM1A (mouse anti- $\alpha$ -tubulin, 1:1000), P-Histone H3 (mouse anti pS10-Histone H3, Cell Signaling, 1:1000), P-TACC3 (rabbit anti pS558-TACC3, a kind gift of Patrick Eyers, the University of Sheffield, UK, 1:1000), anti-pT422 (1 $\mu$ g/ml), and PP1 (mouse monoclonal E-9, Santa Cruz, 1:200). For immunoprecipitations, cells were lysed in lysis buffer (10 mM Tris pH 7.5, 0.1% triton X-100, 100 mM NaCl, 1 mM EDTA, 1 mM EGTA, 50 mM NaF, 20 mM  $\beta$ -glycerophosphate, 0.1 mM DTT plus protease inhibitors), sonicated and soluble extracts prepared. Anti-Myc (4A6) antibodies were added to the supernatant and retrieved using protein A/G beads (Santa Cruz biotechnology). Beads were washed 5 times in lysis buffer prior to analysis.  $\lambda$ -phosphatase

treatment was performed as described previously (Holland and Taylor, 2006).

### **Live cell microscopy**

For high-resolution spinning-disk fluorescence microscopy, cells were plated on poly-L-lysine coated 35 mm glass-bottomed tissue culture dishes (MatTek Inc). 24-48 hours later cells were transferred to CO<sub>2</sub> independent media (Invitrogen) supplemented with 10% fetal bovine serum, 100 U/ml penicillin, 100 units U/ml streptomycin and 2 mM L-glutamine and placed in a heat-controlled stage set at 37°C. Cells were imaged using a 60× 1.4 NA PlanApochromat oil lens on a spinning disk confocal mounted on a Nikon TE2000-E inverted microscope equipped with a krypton-argon 2.5 W water-cooled laser (Spectra-Physics). Images were acquired on a Hamamatsu Orca ER CCD camera controlled by MetaMorph software (Molecular Devices). 5 X 2 μM z sections were acquired at 3 min time intervals for GFP and RFP and maximum intensity projection created using MetaMorph. Movies were assembled and analyzed using QuickTime™ (Apple).

To determine mitotic timing, cells were seeded into 8 well poly-L-lysine coated coverglass chamber slides (Nunc) and 24 hours later transferred to supplemented CO<sub>2</sub> independent media. Cells were maintained at 37°C in an environmental control station and images collected using a Deltavision RT system with a 40× 1.35 NA oil lens at 5 min time intervals. For each time point, 4 X 2.5 μM z sections were acquired for RFP and maximum intensity projection created using softWoRx. Movies were assembled and analyzed using QuickTime™ (Apple).

### **Microinjection**

HeLa cells stably expressing H2B-YFP were plated on poly-L-lysine coated 35 mm glass-bottomed tissue culture dishes (MatTek Inc). 48 hours later cells were transferred to CO<sub>2</sub> independent media (Invitrogen) supplemented with 10% fetal bovine serum, 100 U/ml penicillin, 100 units U/ml streptomycin and 2 mM L-glutamine. Cells were placed on a Nikon Eclipse 300 inverted microscope and viewed with phase contrast using a 20× 0.4 NA long working distance objective. Microinjections were performed using an Eppendorf FemtoJet/InjectMan NI 2 system. The cytoplasm of interphase cells were microinjected to a maximum of ~10% of their volume with either Rhodamine Red-X-conjugated pT422 antibody or Rhodamine Red-X-conjugated Rabbit IgG (Jackson ImmunoResearch). Antibodies were injected at 1 mg/ml in microinjection buffer (10 mM Na<sub>2</sub>PO<sub>4</sub>, pH 7.4, 100 mM KCl, 1 mM MgCl<sub>2</sub>). Injected cells were transferred to a Deltavision RT system and progression through mitosis was monitored by live cell microscopy as described above. For Figure 7B, imaging of the localization of Rhodamine Red-X-conjugated pT422 antibody was obtained using a 100× 1.4 NA PlanApochromat oil lens on a spinning disk confocal mounted on a Nikon TE2000-E as described above. 15 X 0.5 μm z sections were acquired for GFP and RFP and maximum intensity projection created using MetaMorph.

### **Protein purification**

Recombinant CENP-E<sup>1-473</sup>-TagRFP-T and CENP-E<sup>1-473</sup>-Myc-6His proteins were expressed in *E.coli* [strain Rosetta (DE3)] and purified as previously described (Kim et al., 2008; Wood et al., 1997). 6His-tagged *Xenopus* Aurora A was expressed from pET28 vector and purified using Ni-NTA agarose (Qiagen). *Xenopus* Aurora B and full-length INCENP were co-expressed from a bicistronic vector in *E.coli* [strain BL21(DE3) pLys] and purified as described (Rosasco-Nitcher et al., 2008). 6His-tagged *Xenopus* PP1γ was purified using Ni-NTA agarose (Qiagen) from

uninduced *E.coli* [strain Rosetta(DE3)] grown for 48 hours at room temperature in SOB medium supplemented with 1 mM MnCl<sub>2</sub>.

### ***In vitro* kinase and phosphatase assays**

*In vitro* kinase assays were performed at room temperature in 20 mM Tris pH 7.5, 25 mM KCl, 1 mM MgCl<sub>2</sub>, 1 mM DTT in the presence of 0.2 mM MgATP and 50 µCi/ml γ-<sup>32</sup>P ATP. 2 µM of CENP-E<sup>1-473</sup>-myc-6His was incubated with 0.2 µM of bacterially purified Aurora A or B at room temperature for 30 min, with the exception of kinetics studies. Kinase reactions were stopped with sample buffer and analyzed by SDS-PAGE. For quantification, individual bands were excised and the incorporation of <sup>32</sup>P was quantified using a scintillation counter (Beckman).

*In vitro* phosphatase assay was performed at room temperature by adding either 2 µM of purified PP1γ or 2 µM of PP1γ preincubated with 5 µM of Microcystin-LR (EMD) for 10 min, into the kinase reaction containing CENP-E<sup>1-473</sup>-myc-6His (2 µM) and Aurora A (0.5 µM). The phosphatase reaction buffer was supplemented with MnCl<sub>2</sub> and KCl to have 25 mM Tris, pH 7.5, 100 mM KCl, 1 mM MgCl<sub>2</sub>, 1 mM MnCl<sub>2</sub>, 1 mM DTT, 0.1 mM MgATP final. The phosphatase reaction was stopped with sample buffer and analyzed by immunoblot using pT422 antibody.

### ***In vitro* pulldown experiments**

5 µM of bacterially purified PP1γ was mixed with 5 µM, 10 µM, or 25 µM of wild-type or W425A CENP-E<sup>1-473</sup> in 50 mM Tris pH 7.5, 150 mM KCl, 1 mM MnCl<sub>2</sub>, 1 mM MgCl<sub>2</sub>, 0.1 mM MgATP, 1 mM DTT, 0.05% NP-40, 10% Glycerol and incubated for 30 min at room temperature and additional 30 min following addition of Microcystin-agarose (Millipore). PP1-

bound complexes were washed five times in binding buffer and eluted from the beads in SDS sample buffer.

### **ATPase assays**

Steady-state ATPase rate was measured at room temperature in a coupled enzyme system based on 2-amino-6-mercapto-7-methyl-purine riboside (MESG) and purine nucleoside phosphorylase (PNP) (EnzChek Phosphate Assay Kit, Invitrogen). 2  $\mu$ M of freshly prepared protein was pre-incubated with or without 0.2  $\mu$ M of active Aurora A for 30 min at room temp and the reaction was kept on ice until use. To measure ATPase rate, 20 nM of CENP-E was incubated with varying concentrations of microtubules (0 – 4  $\mu$ M) in assay buffer (10 mM Imidazole pH 6.8, 10 mM  $MgCl_2$ , 5 mM K-acetate, 4 mM Mg-acetate, 2 mM EGTA, 0.1 mM bovine serum albumin, 2 mM ATP) and 0.2 mM MESG and 1 U/ml of PNP. Prism (Graphpad) was used for hyperbola curve fitting to derive  $k_{cat}$  and  $K_m$ MT.

### **Microtubule pelleting assays**

Assembly of taxol-stabilized microtubules and measurement of polymerized tubulin concentration were performed as described (<http://mitchison.med.harvard.edu/protocols.html>). 2  $\mu$ M of wild-type or T424A *Xenopus* CENP-E<sup>1-473</sup> was incubated at room temperature with or without 0.2  $\mu$ M of Aurora A for 15 min in BRB80 buffer (80 mM K-PIPES, pH 6.8, 1 mM  $MgCl_2$ , 1 mM EGTA) with 0.1 mM MgATP. CENP-E<sup>1-473</sup> was subsequently mixed with varying concentrations of microtubules in the presence of 2 mM MgADP and incubated for 15 min at room temperature. 40  $\mu$ l of the reaction was layered onto 100  $\mu$ l of BRB80 + 40% glycerol and sedimented for 5 min at 90,000 rpm in a TLA100 rotor. 20  $\mu$ l was removed from the top for the

supernatant sample and the remaining supernatant was aspirated. 40  $\mu$ l of BRB80 containing 5 mM  $\text{CaCl}_2$  was added to the pellet for 10 min on ice. Equivalent volumes of supernatant and pellet fractions were analyzed by SDS-PAGE.

### **Supplemental References**

Cheeseman, I.M., Hori, T., Fukagawa, T., and Desai, A. (2008). KNL1 and the CENP-H/I/K complex coordinately direct kinetochore assembly in vertebrates. *Mol Biol Cell* *19*, 587-594.

Holland, A.J., and Taylor, S.S. (2006). Cyclin-B1-mediated inhibition of excess separase is required for timely chromosome disjunction. *J Cell Sci* *119*, 3325-3336.

Kim, Y., Heuser, J.E., Waterman, C.M., and Cleveland, D.W. (2008). CENP-E combines a slow, processive motor and a flexible coiled coil to produce an essential motile kinetochore tether. *J Cell Biol* *181*, 411-419.

Rosasco-Nitcher, S.E., Lan, W., Khorasanizadeh, S., and Stukenberg, P.T. (2008). Centromeric Aurora-B Activation Requires TD-60, Microtubules, and Substrate Priming Phosphorylation. *Science* *319*, 469-472.

Taylor, S.S., Hussein, D., Wang, Y., Elderkin, S., and Morrow, C.J. (2001). Kinetochore localisation and phosphorylation of the mitotic checkpoint components Bub1 and BubR1 are differentially regulated by spindle events in human cells. *J Cell Sci* *114*, 4385-4395.

Wood, K.W., Sakowicz, R., Goldstein, L.S.B., and Cleveland, D.W. (1997). CENP-E Is a Plus End-Directed Kinetochore Motor Required for Metaphase Chromosome Alignment. *Cell* *91*, 357-366.

Yao, X., Anderson, K.L., and Cleveland, D.W. (1997). The Microtubule-dependent Motor Centromere-associated Protein E (CENP-E) Is an Integral Component of Kinetochore Corona Fibers That Link Centromeres to Spindle Microtubules. *J Cell Biol* *139*, 435-447.

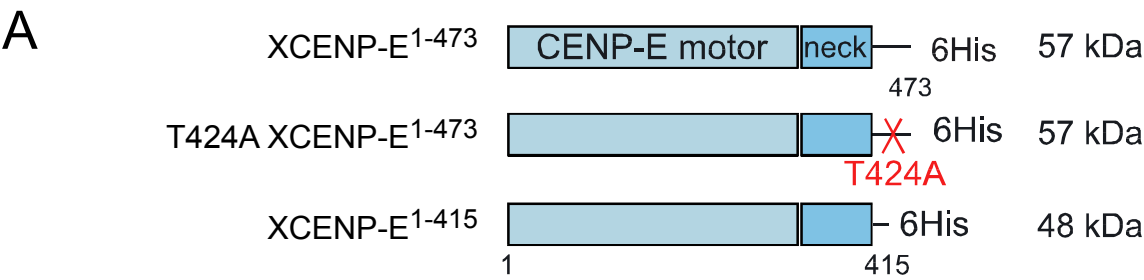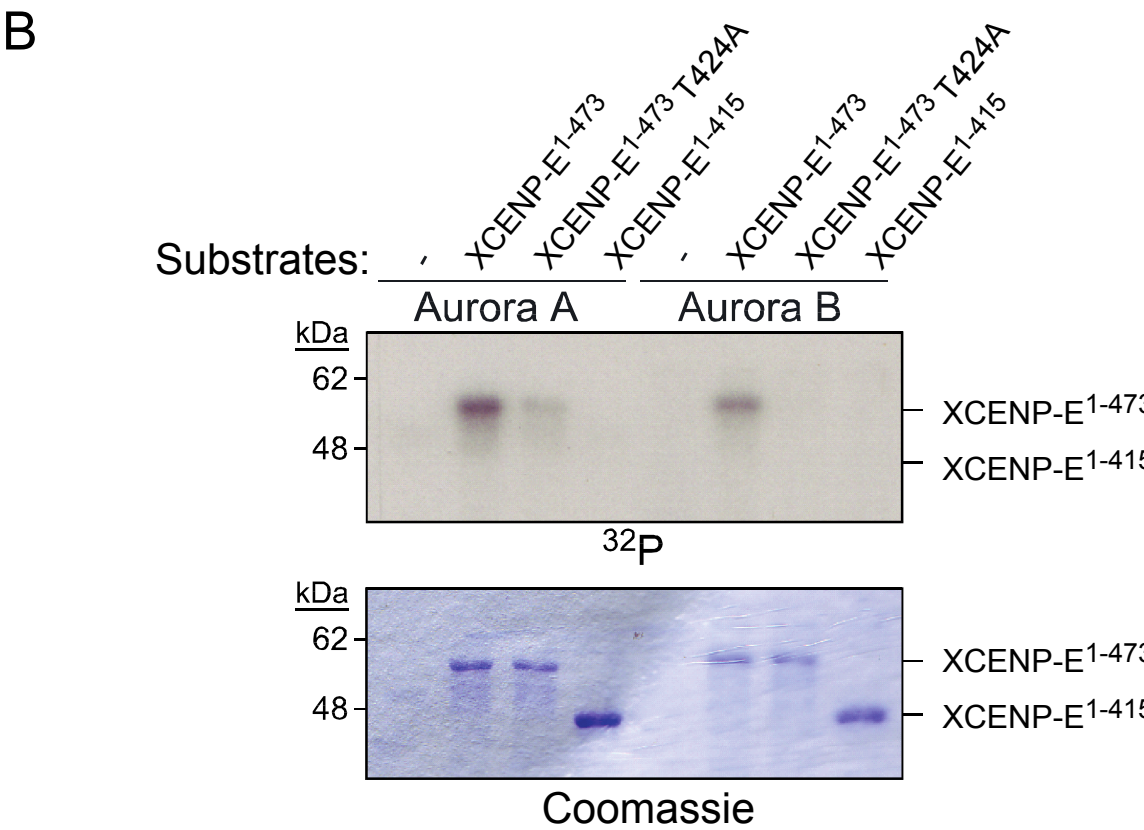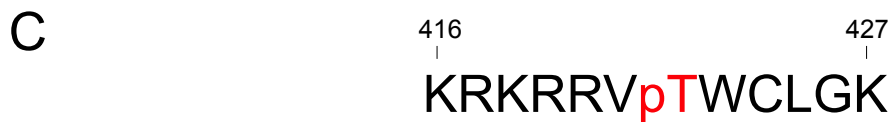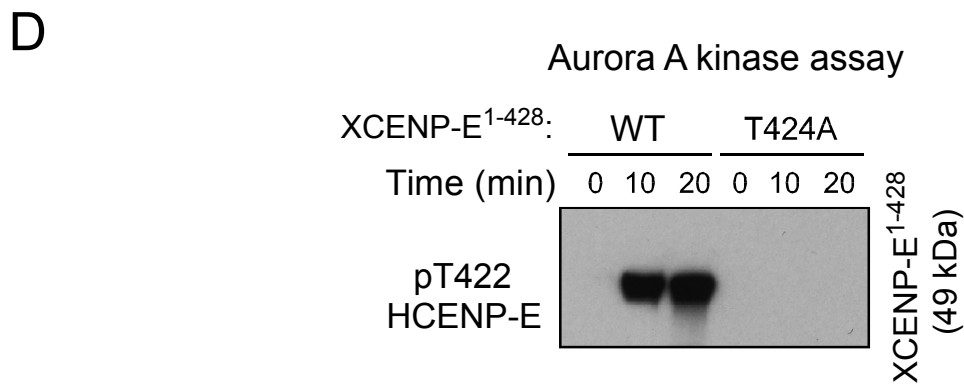

Figure S1

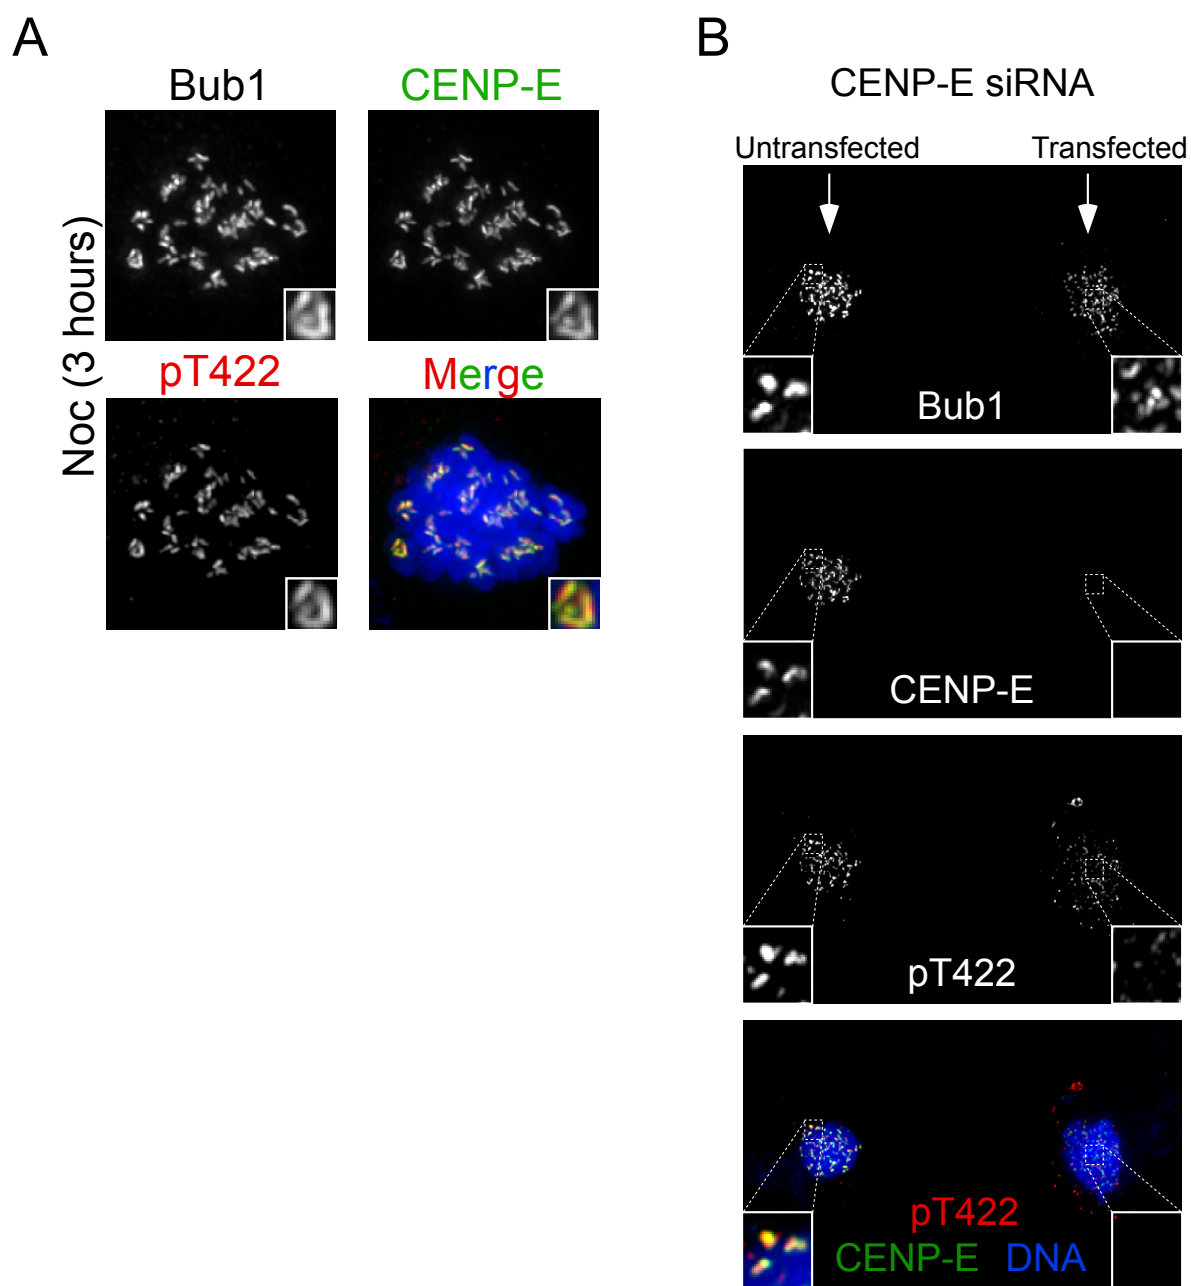

Figure S2

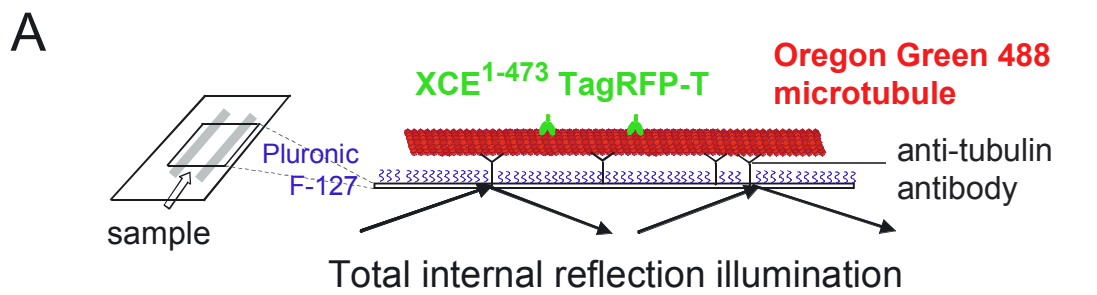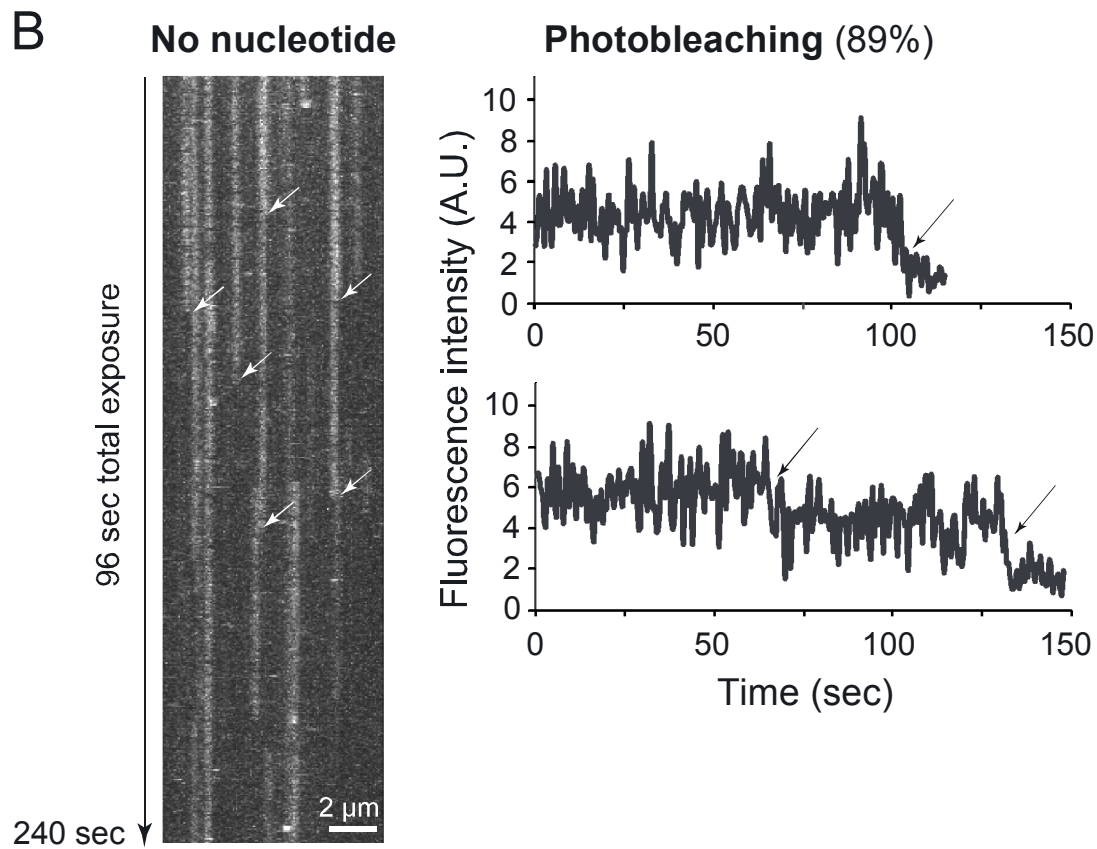

Figure S3

A

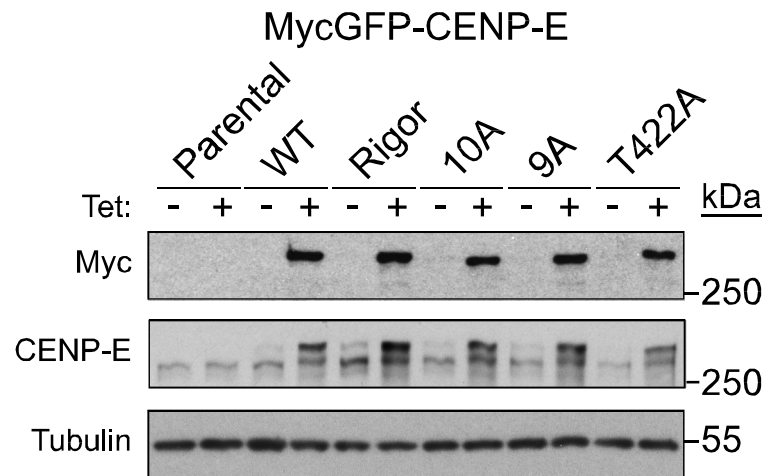

B

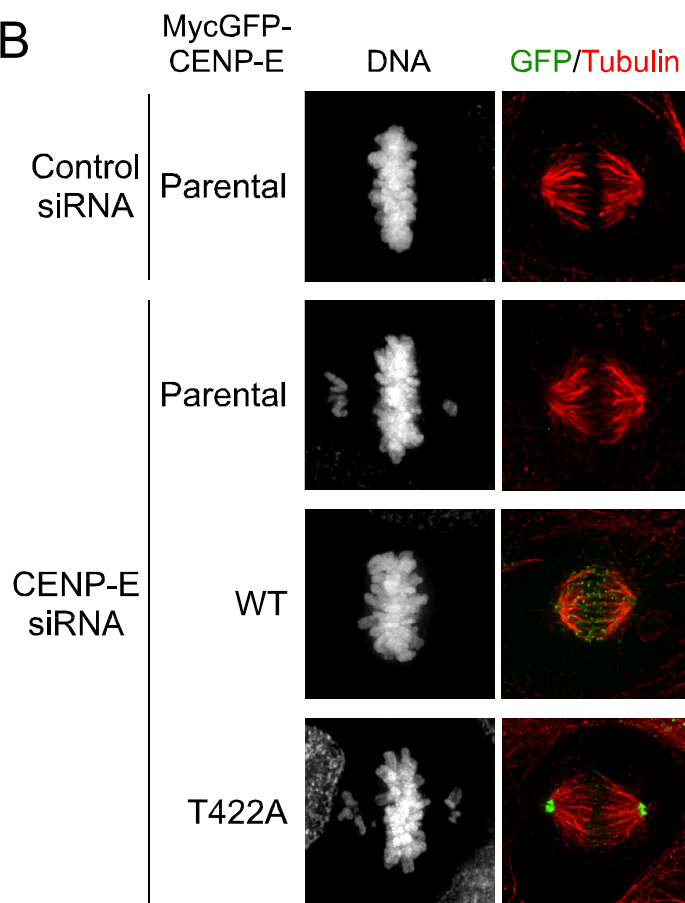

C

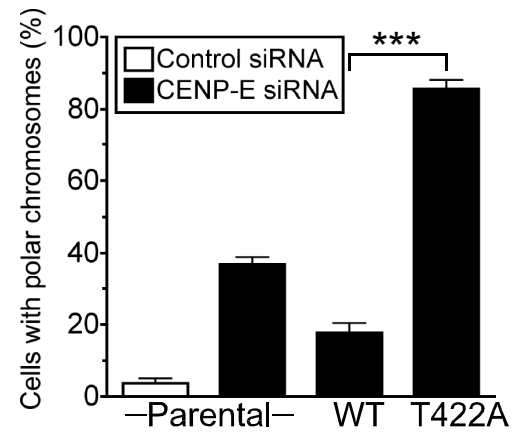

D

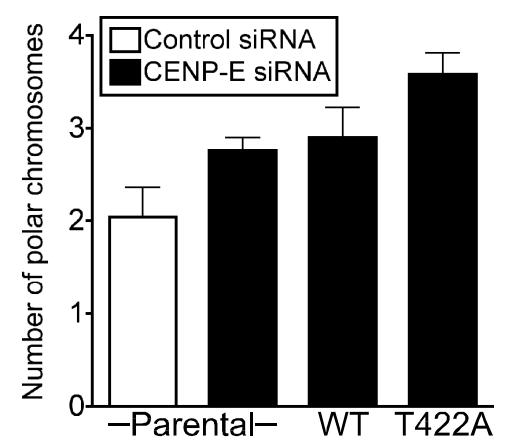

Figure S4

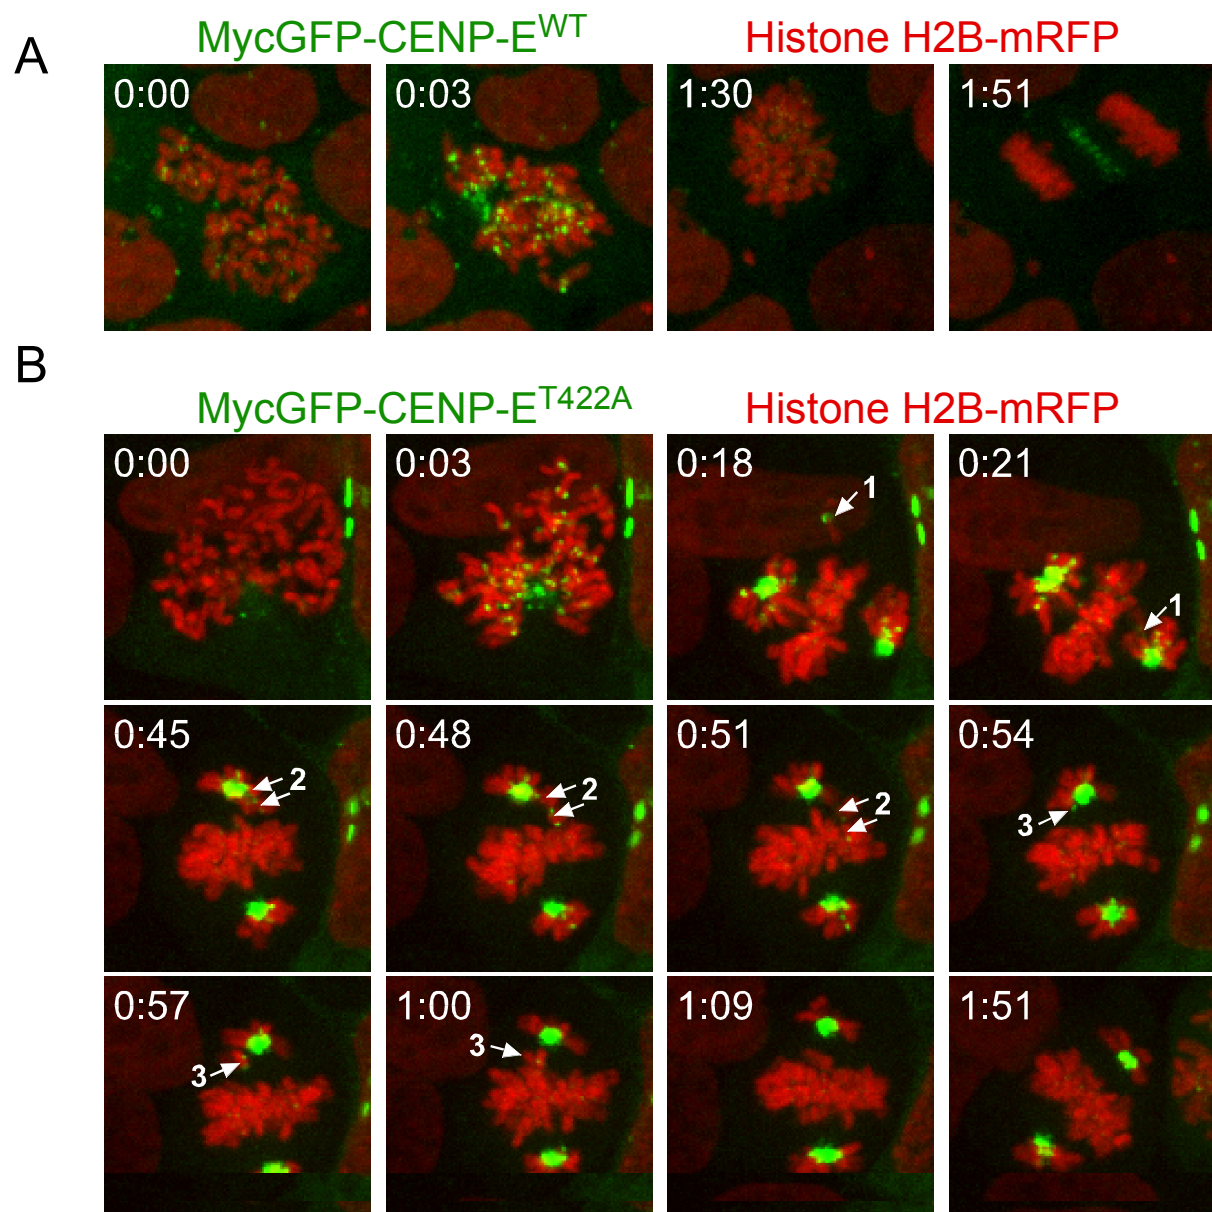

Figure S5

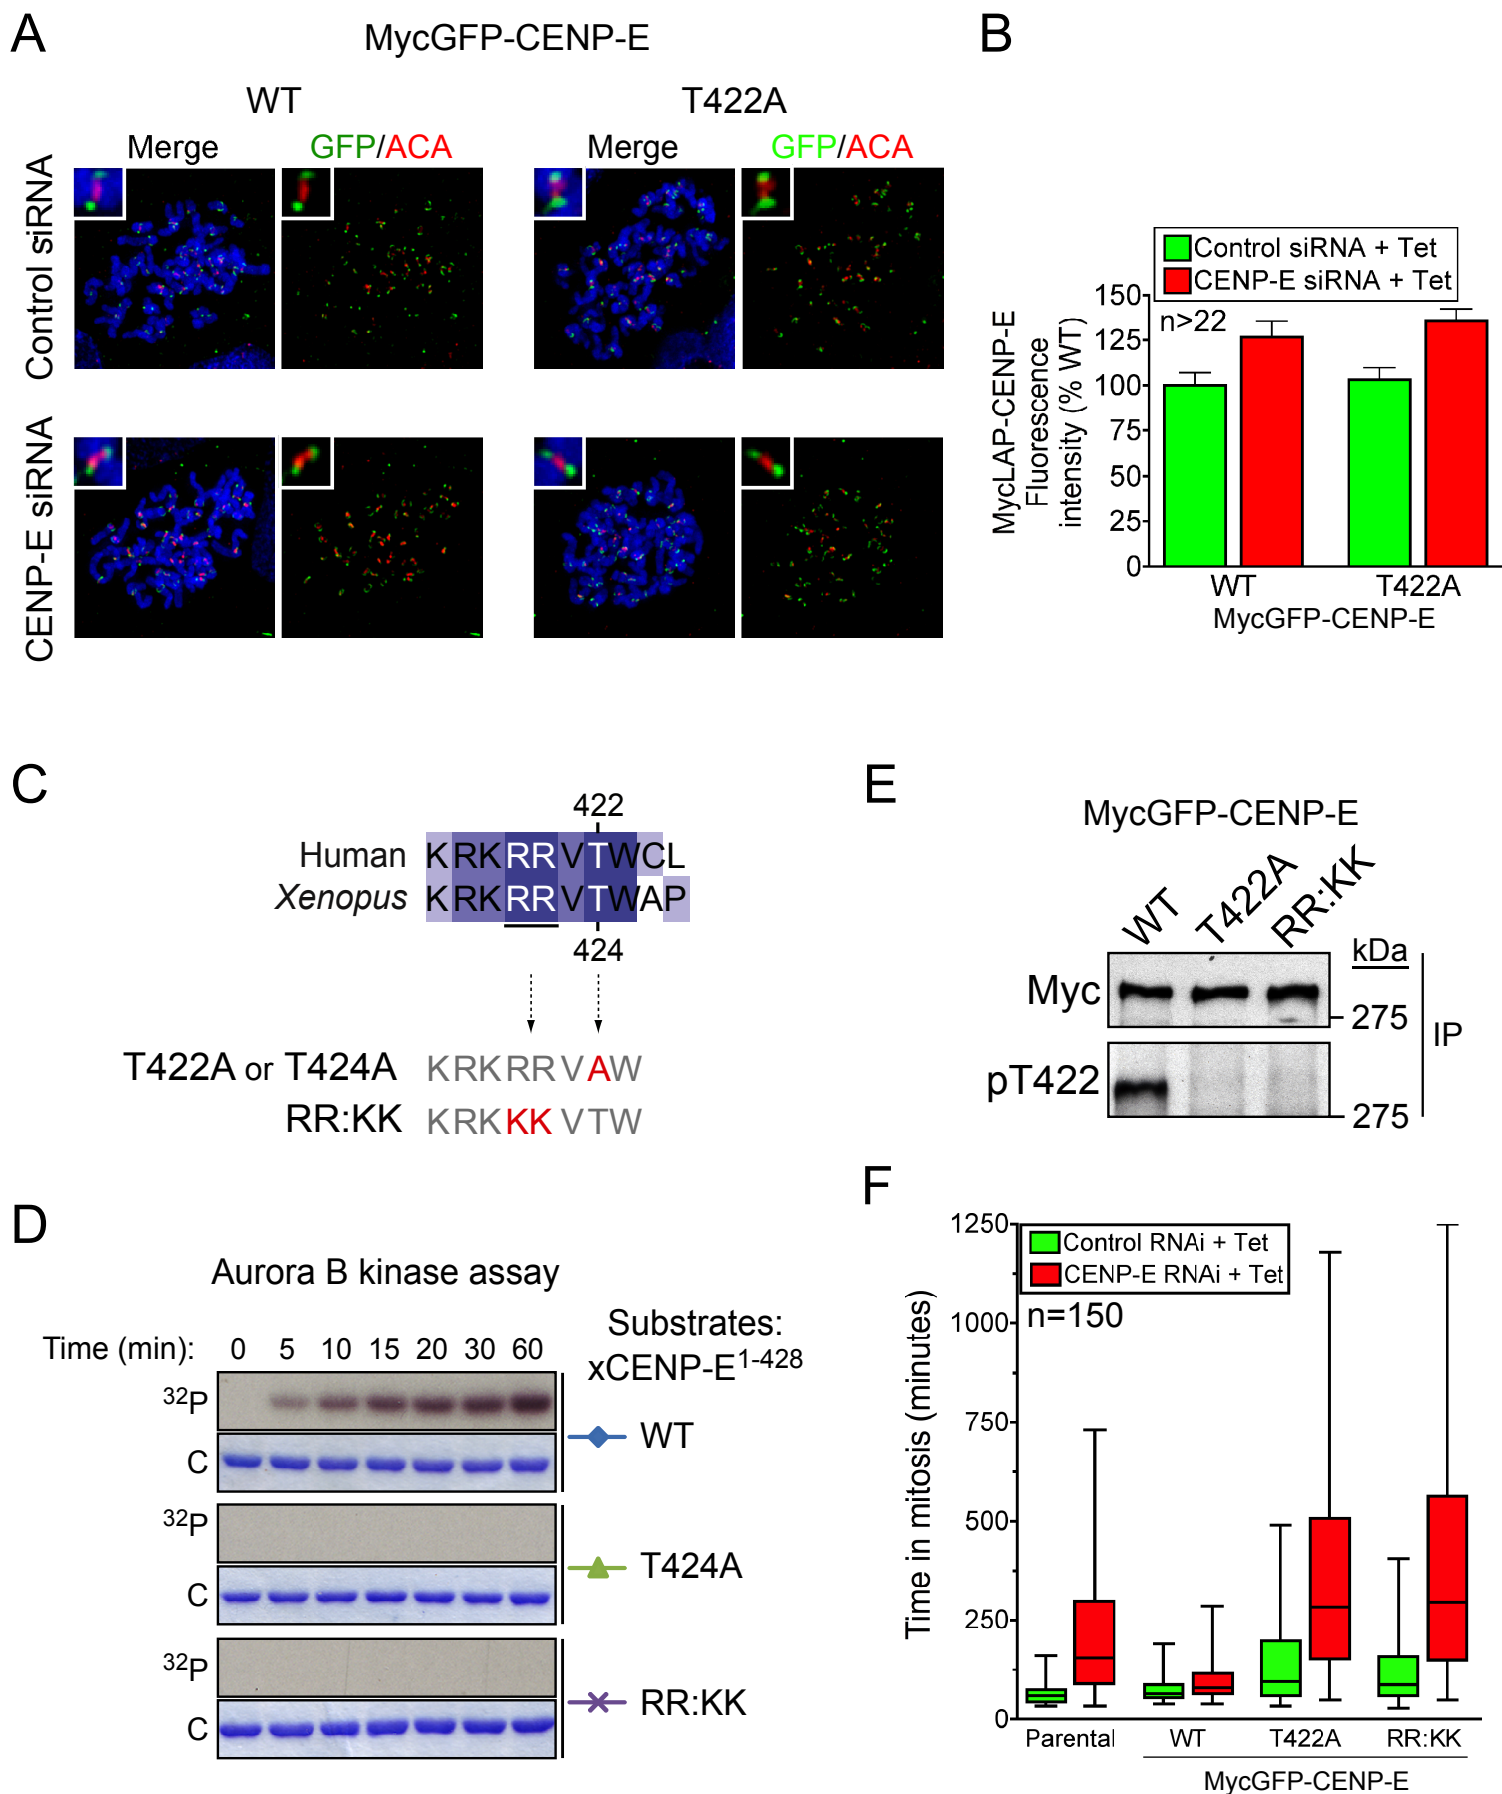

Figure S6

Mon  $\rightarrow$  ZM + MG  $\rightarrow$  MG

2

2

Drug:

Monastrol

ZM+MG132

MG13 2

## Begin Filming

## Histone H2B-mRFP

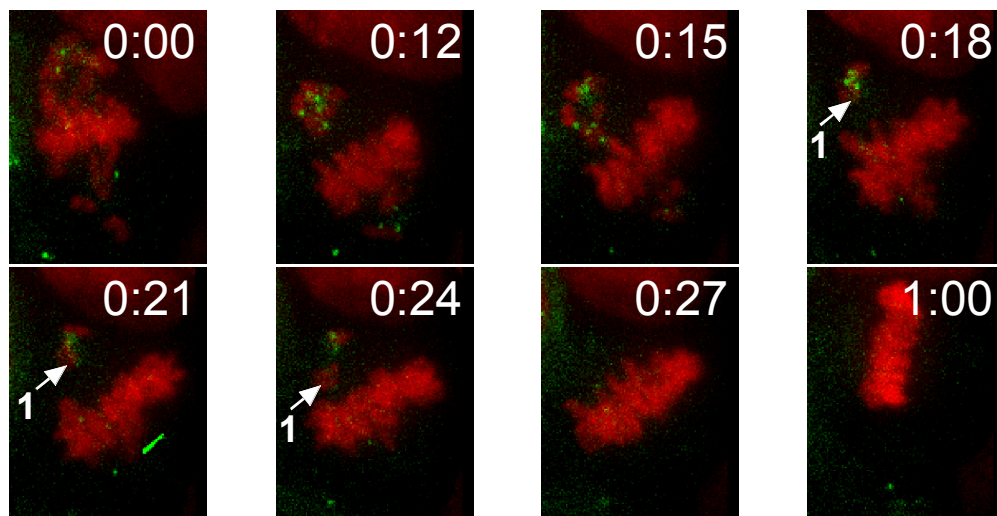

Histone H2B-mRFP

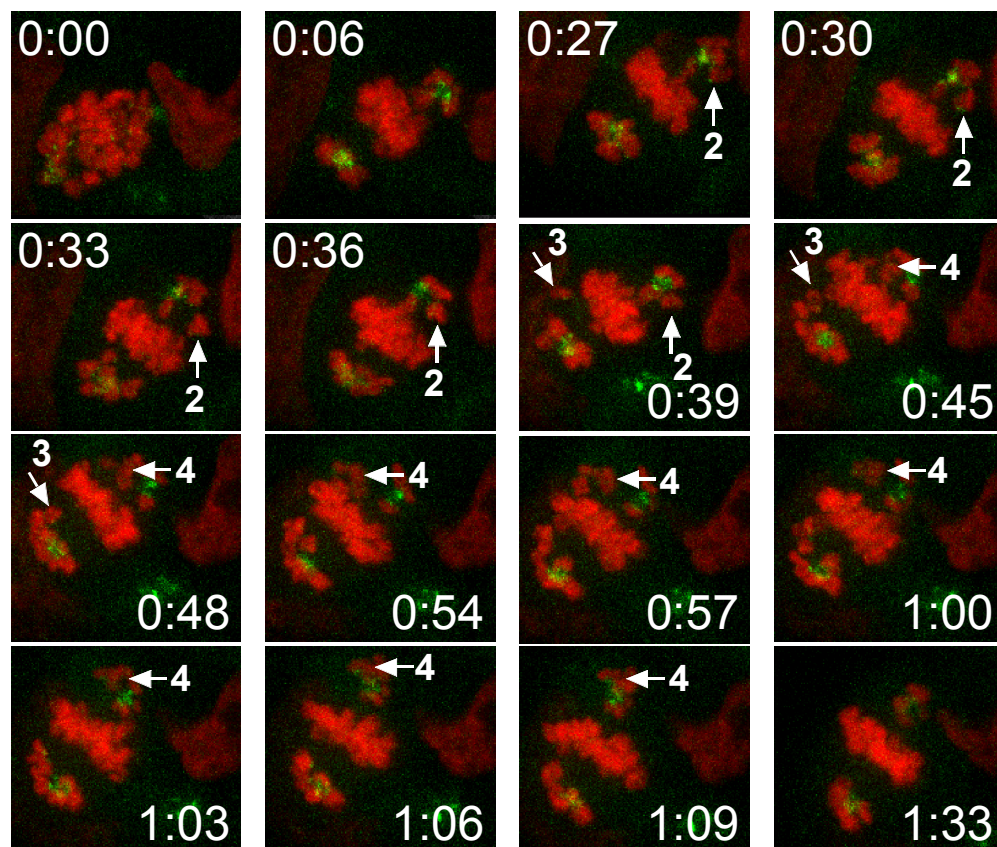

Figure S7
